# Supplementary material for: Preparation and characterization of pyrene modified uridine derivatives as potential electron donors in RNA
Source: Royal Society of Chemistry journal article supplement (doi:10.1039/c8ob02246a), 2018-01-01

## ***Supporting Information***

### **Preparation and characterization of pyrene modified uridines as potential electron donors in RNA**

Jennifer Frommer, Beatrice Karg, Klaus Weisz, Sabine Müller

Ernst Moritz Arndt University Greifswald, Institute for Biochemistry, Felix Hausdorff Str. 4, D-17487 Greifswald, Germany

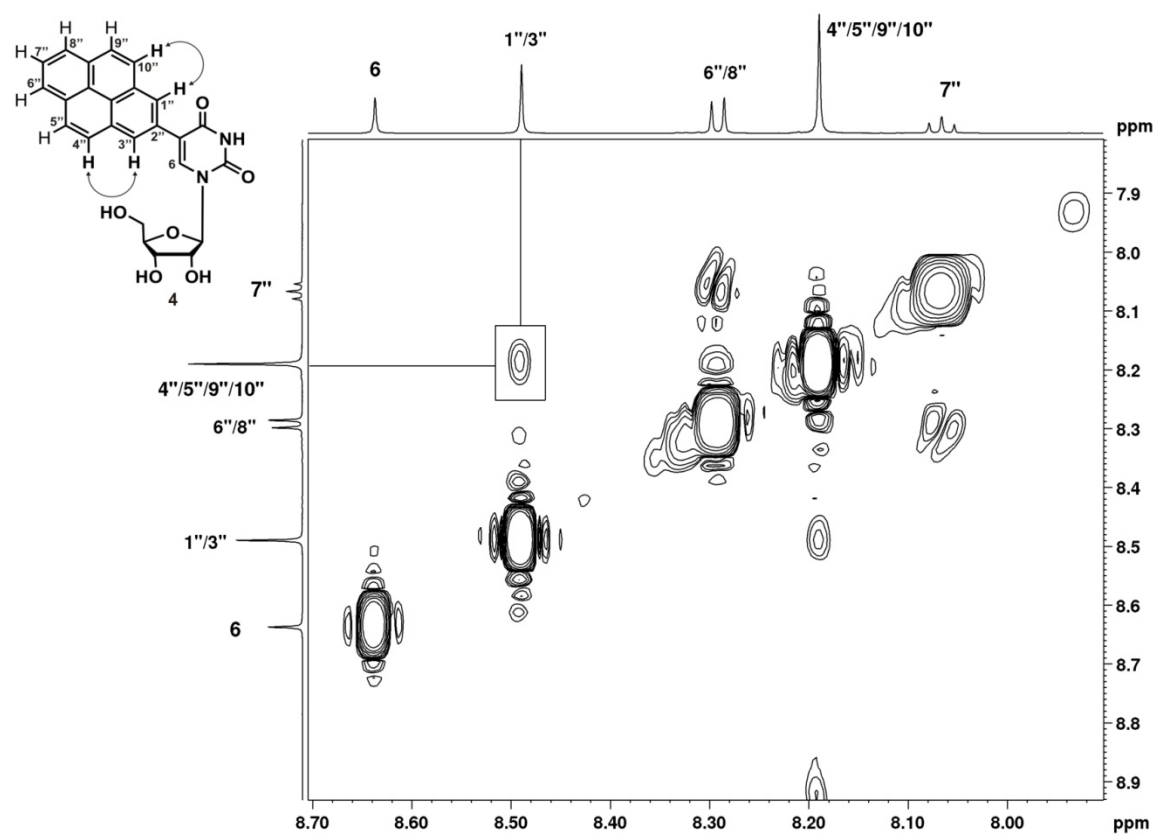

**Figure S1** NOESY spectra showing the aromatic protons of the pyrene modified nucleoside **4**. The NOE contact between H1''/H10'' and H3''/H4'' verify the C2''-C5-linkage between pyrene and the pyrimidine base.

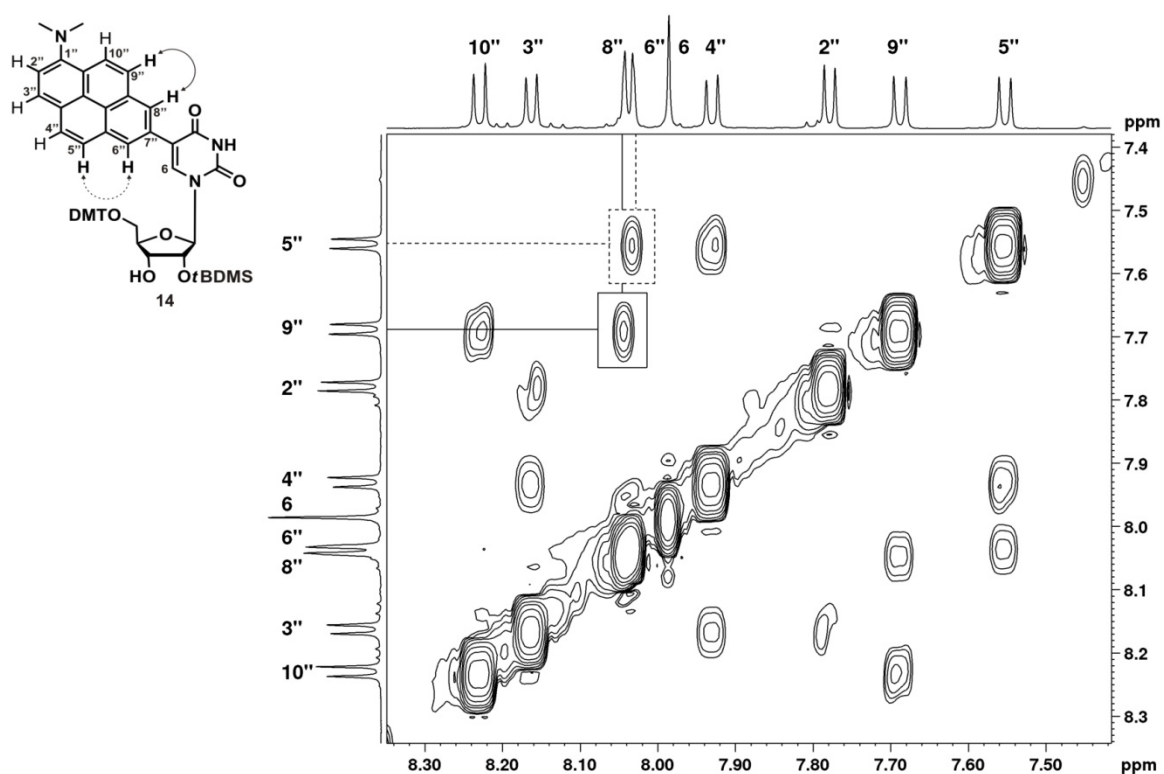

**Figure S2** NOESY spectra showing the aromatic protons of the pyrene modified nucleoside **14**. The two NOE contacts between H6''/5'' and H8''/H9'' serve as evidence for the C7''-C5-linkage between the pyrene and the pyrimidine base of the nucleoside.

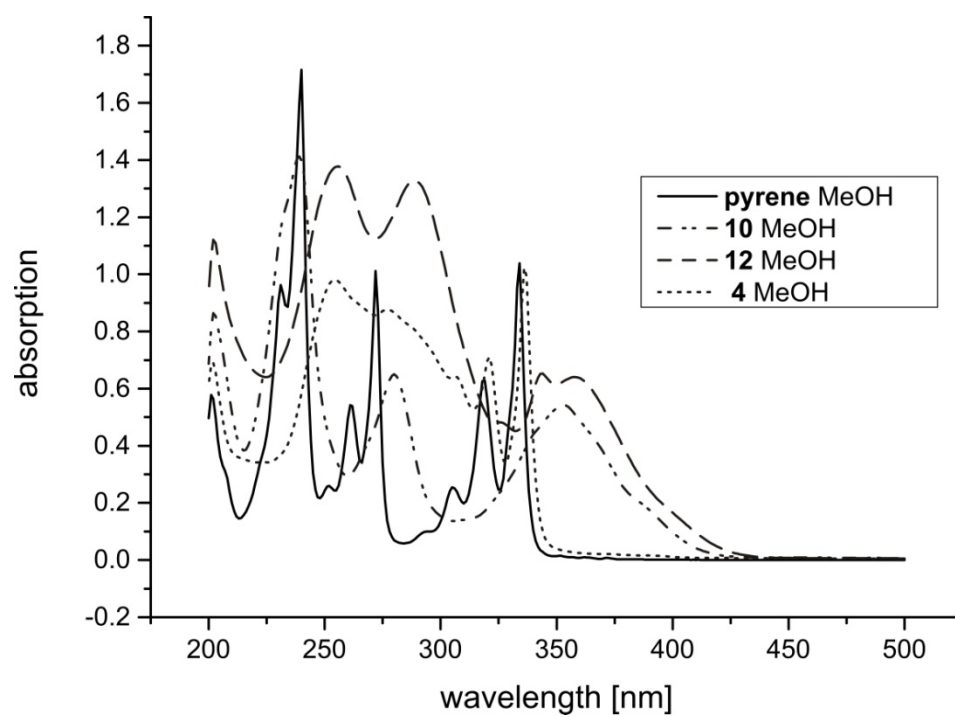

**Figure S3** UV/Vis absorption spectra of pyrene, DMAPy **10**, DMAPyU **12** and PyU **4** in MeOH. All compounds were measured at a concentration of 25  $\mu$ M.

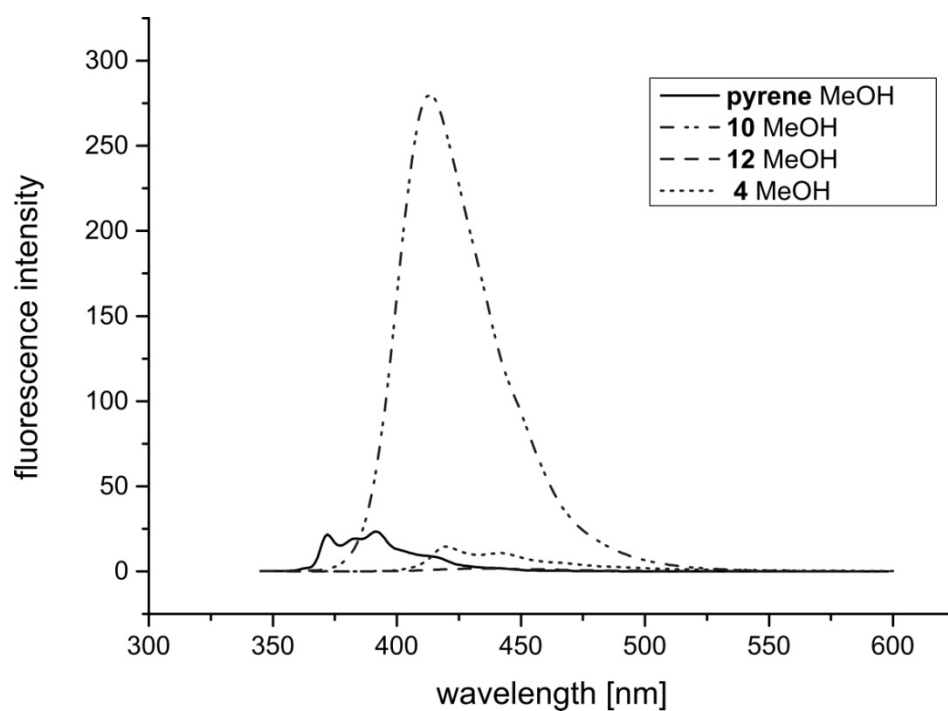

**Figure S4** Fluorescence spectra of pyrene, DMAPy **10**, DMAPyU **12** and PyU **4** in MeOH. Concentration of all compounds was adjusted to uniform optical density at the characteristic excitation wavelength. In MeOH: pyrene (334 nm, 0.5  $\mu$ M); **10** (350 nm, 1  $\mu$ M); **12** (355 nm; 0.75  $\mu$ M); **4** (337 nm, 1  $\mu$ M).

**Table S1** Fluorescence quantum yields of pyrene, DMAPy **10**, DMAPyU **12** and PyU **4** in MeOH. Quantum yields were determined using quinine sulfate in 0.1 N H<sub>2</sub>SO<sub>4</sub> as standard.

| Compound      | $\Phi$ (MeOH) |
|---------------|---------------|
| <b>pyrene</b> | 0.023         |
| <b>10</b>     | 0.385         |
| <b>12</b>     | 0.003         |
| <b>4</b>      | 0.018         |

**NMR spectra:**

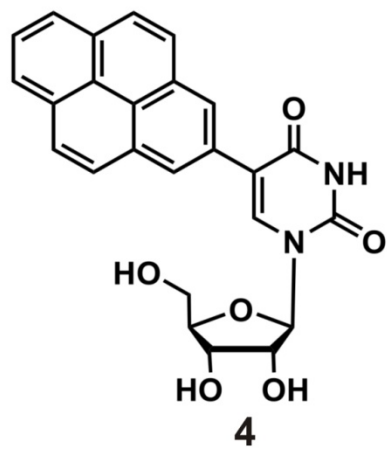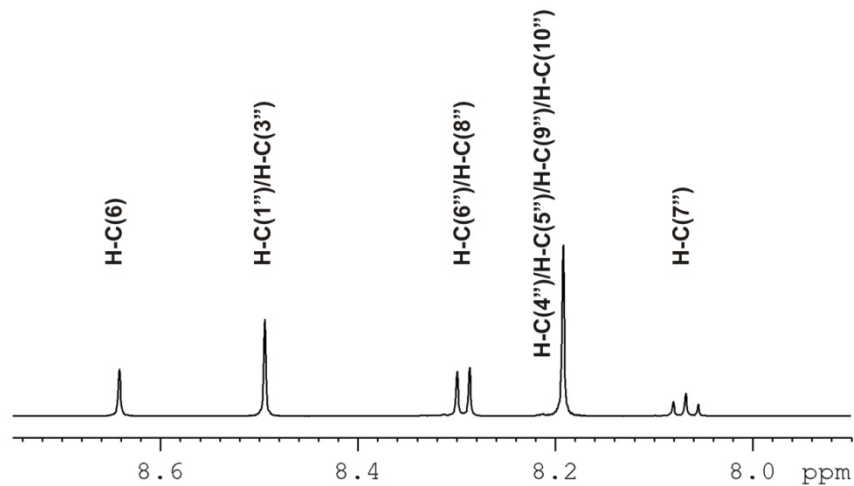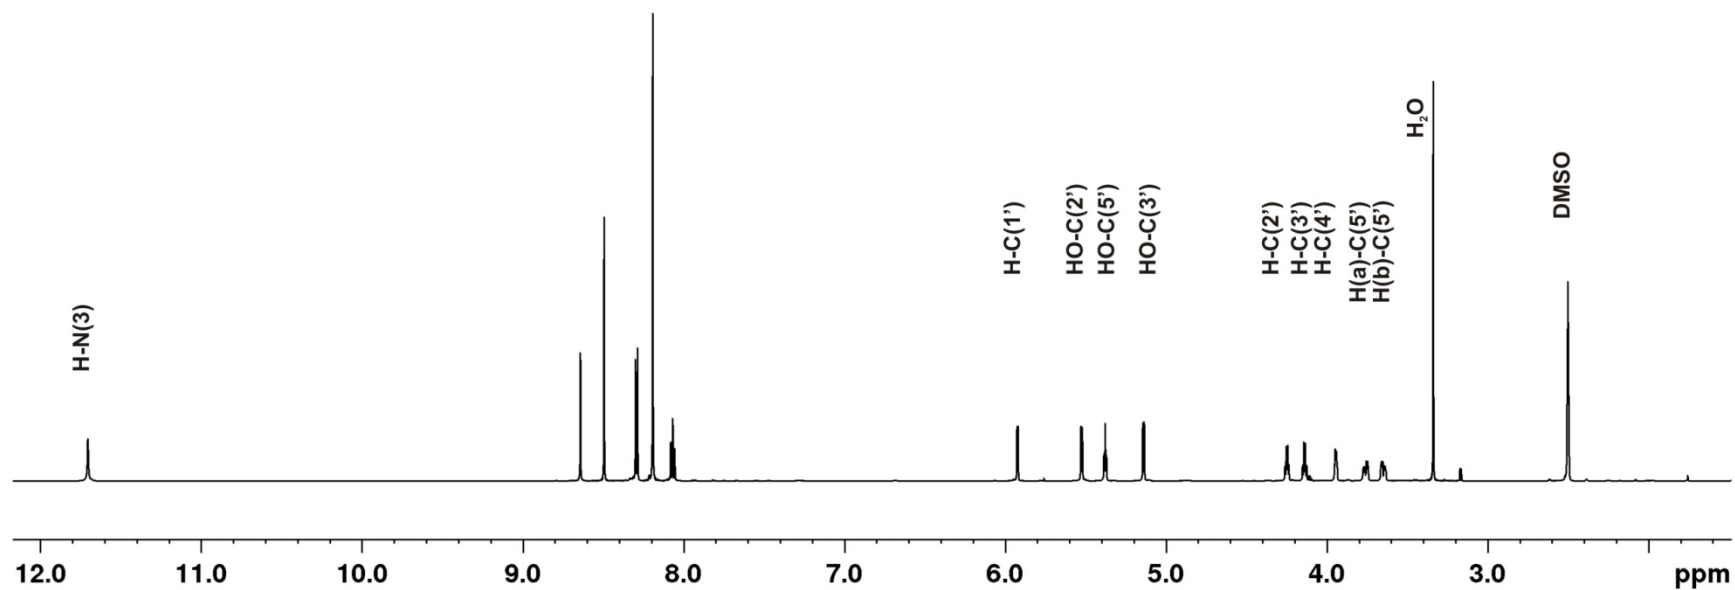



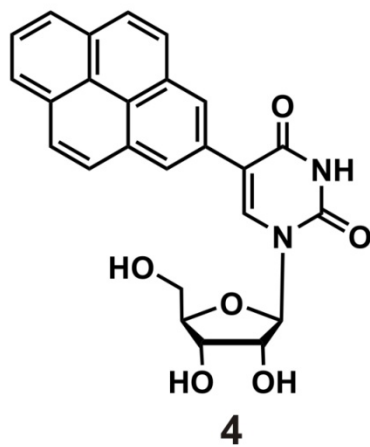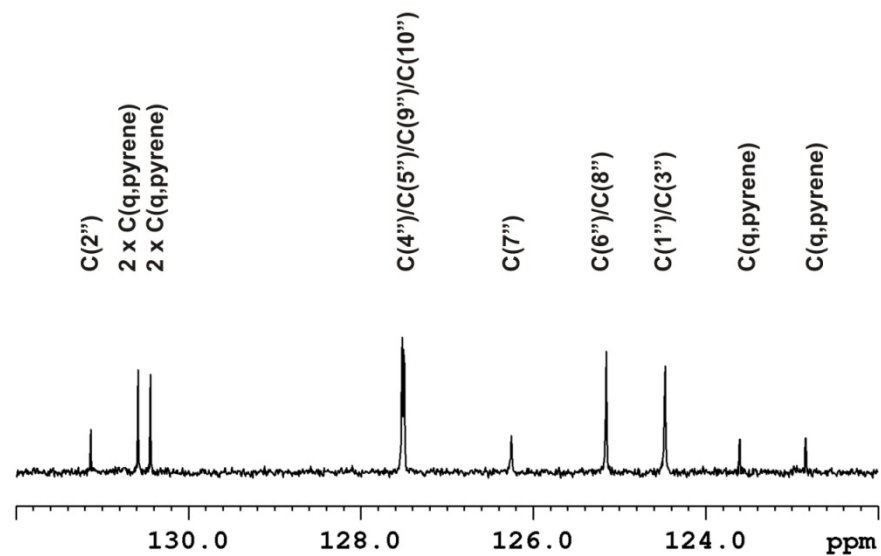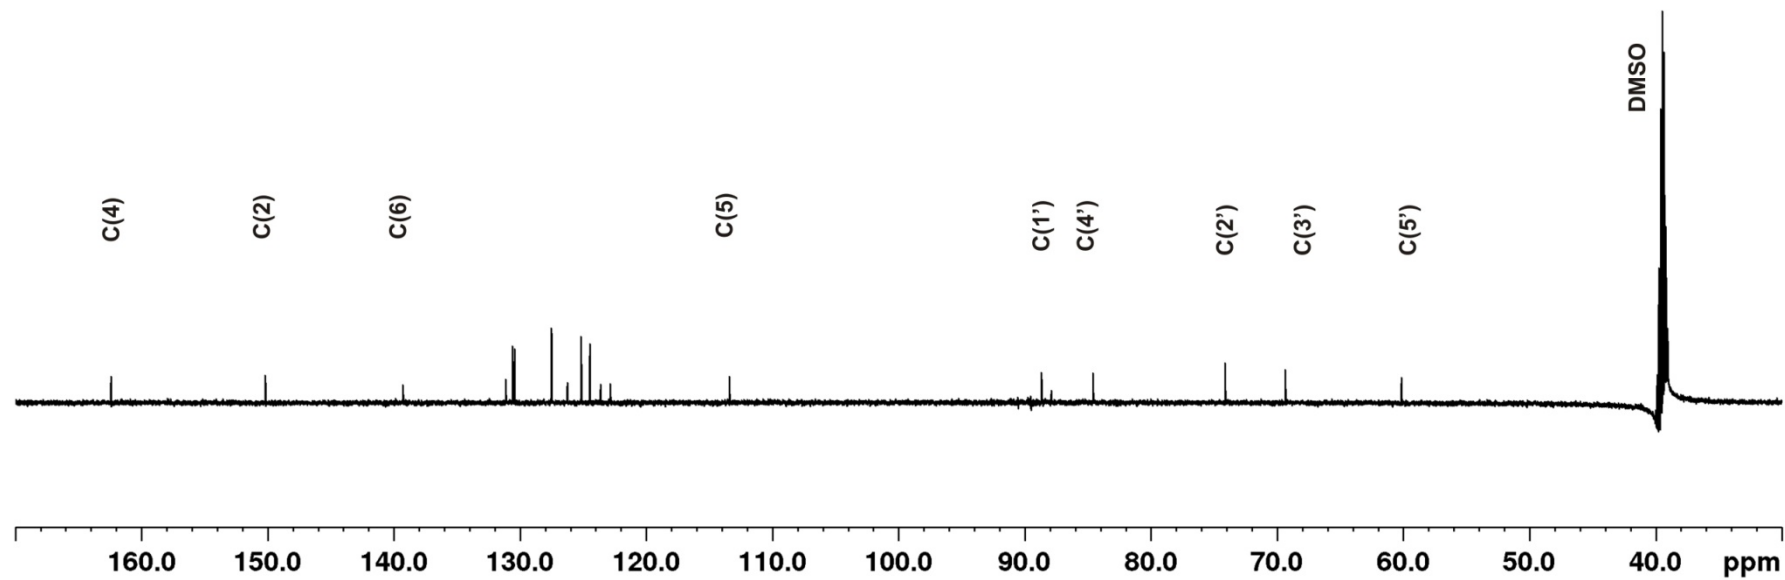

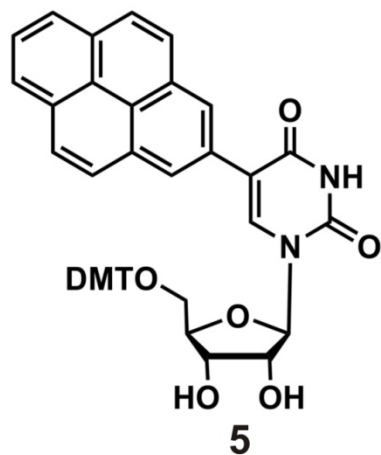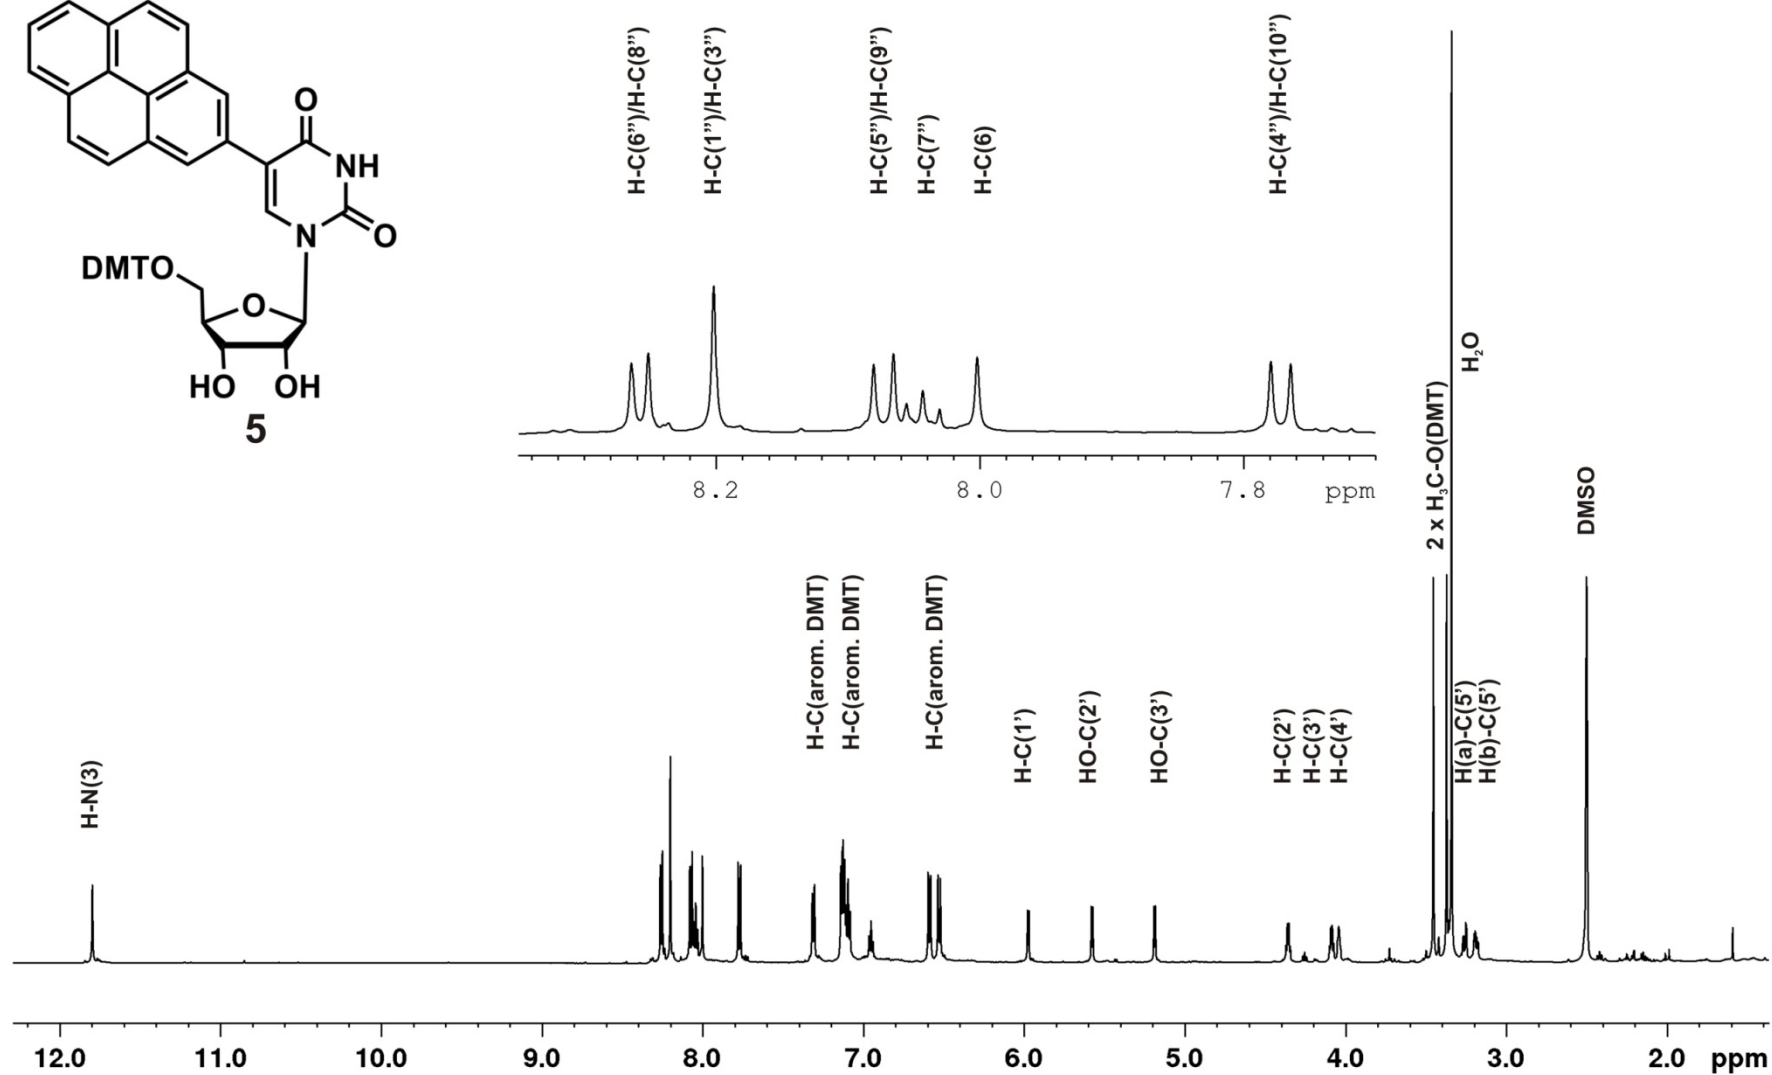

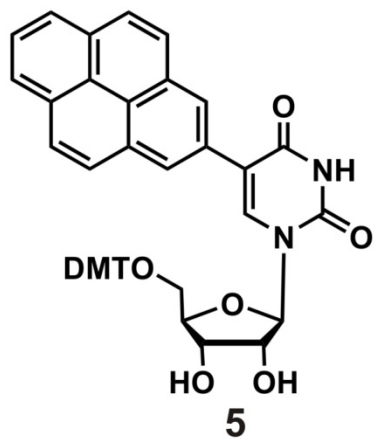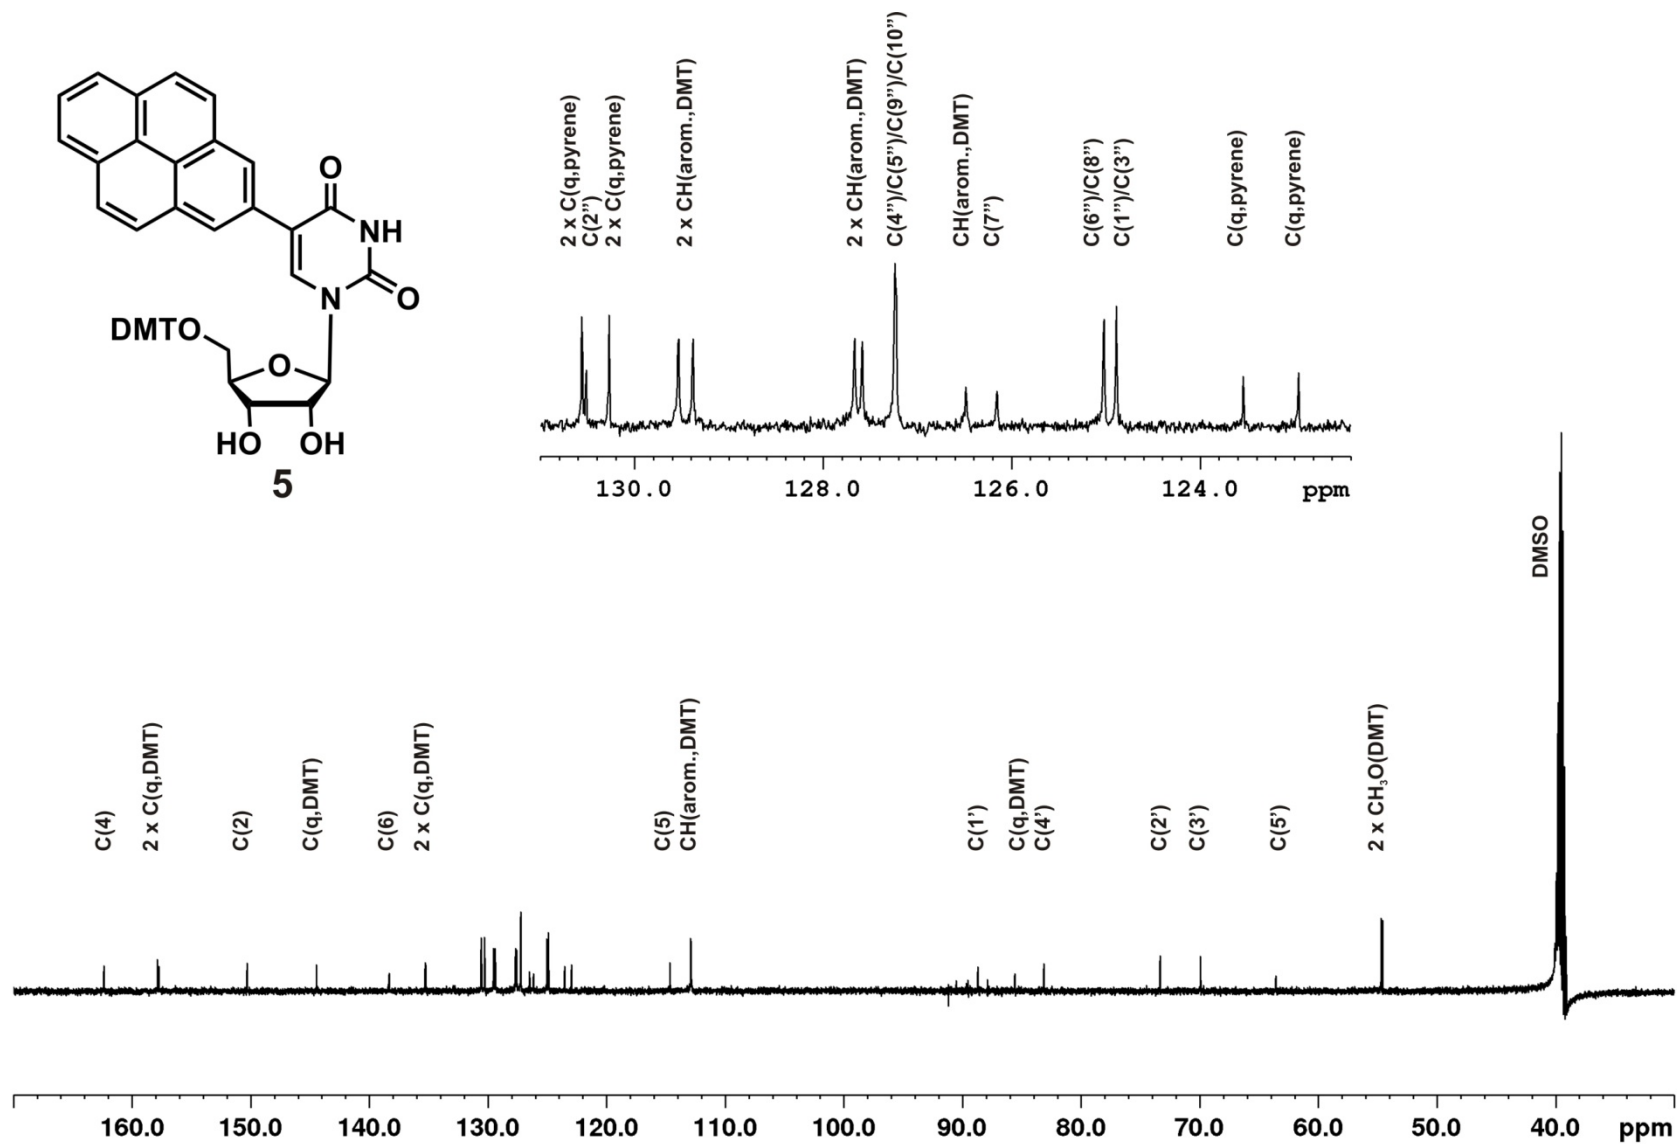

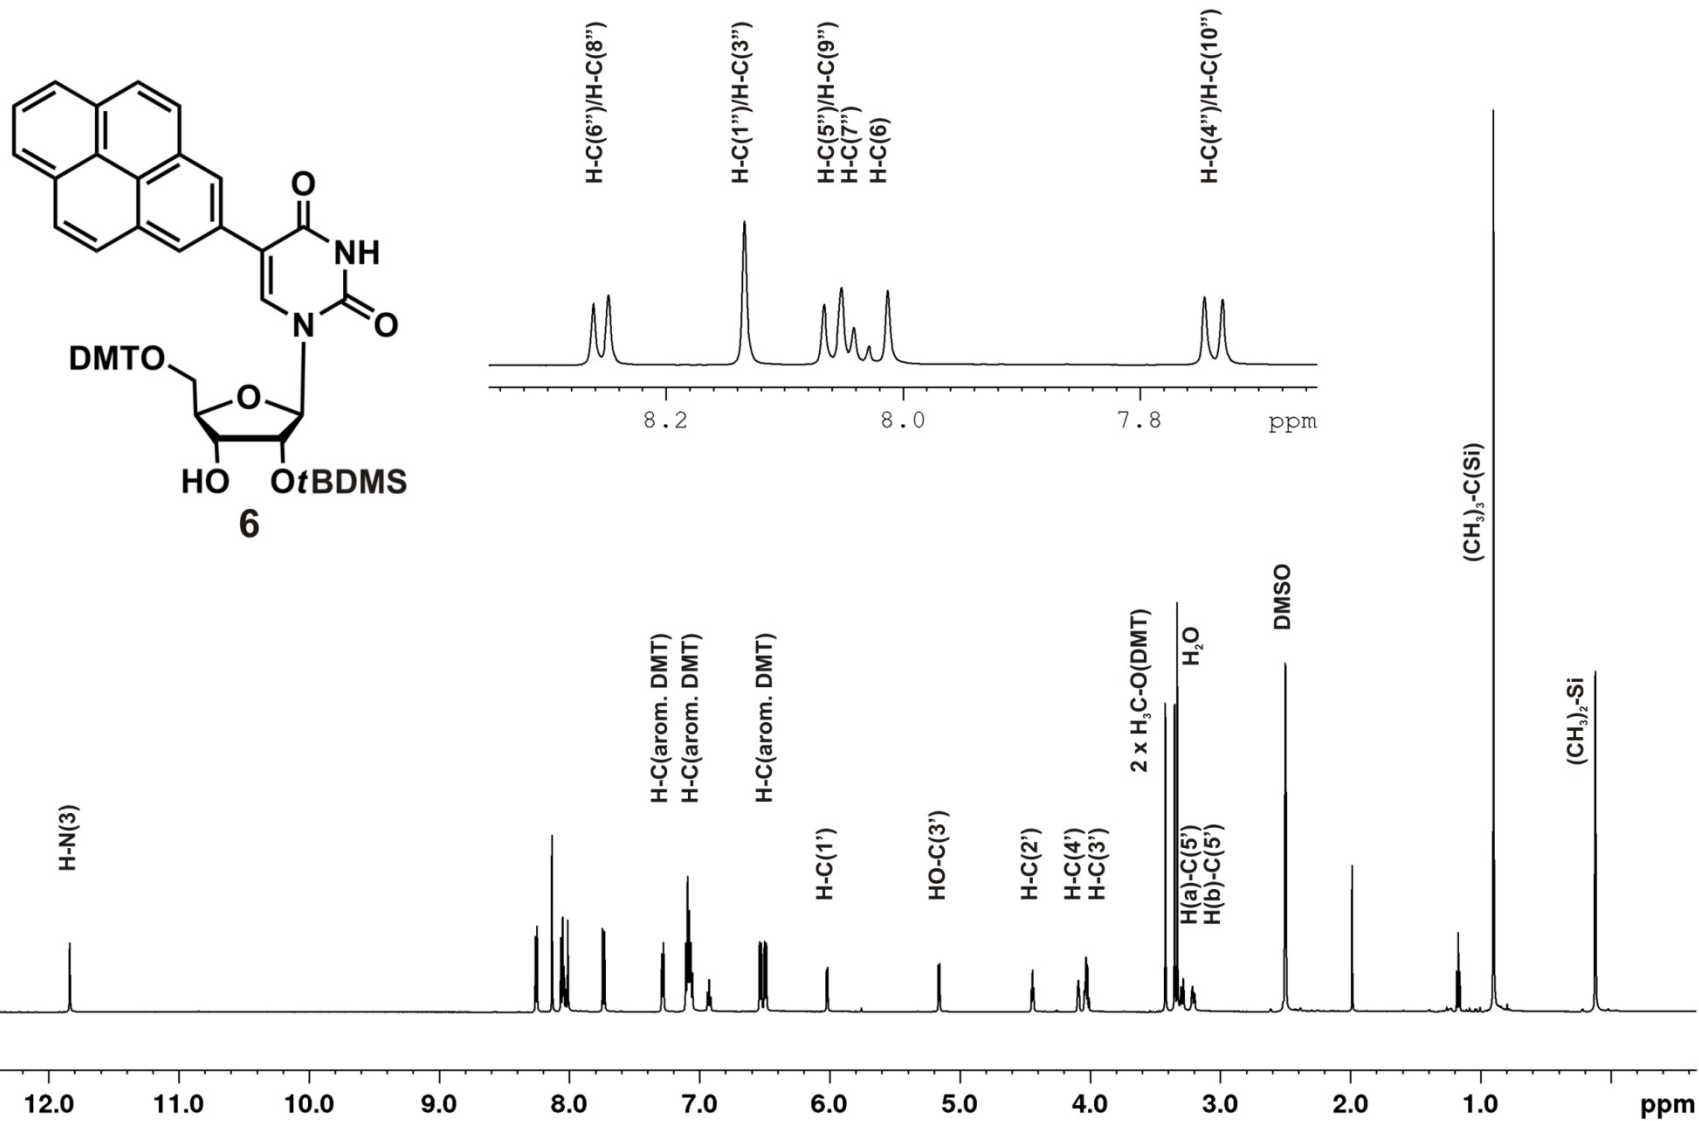

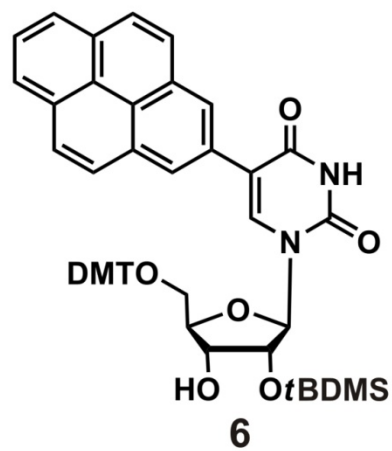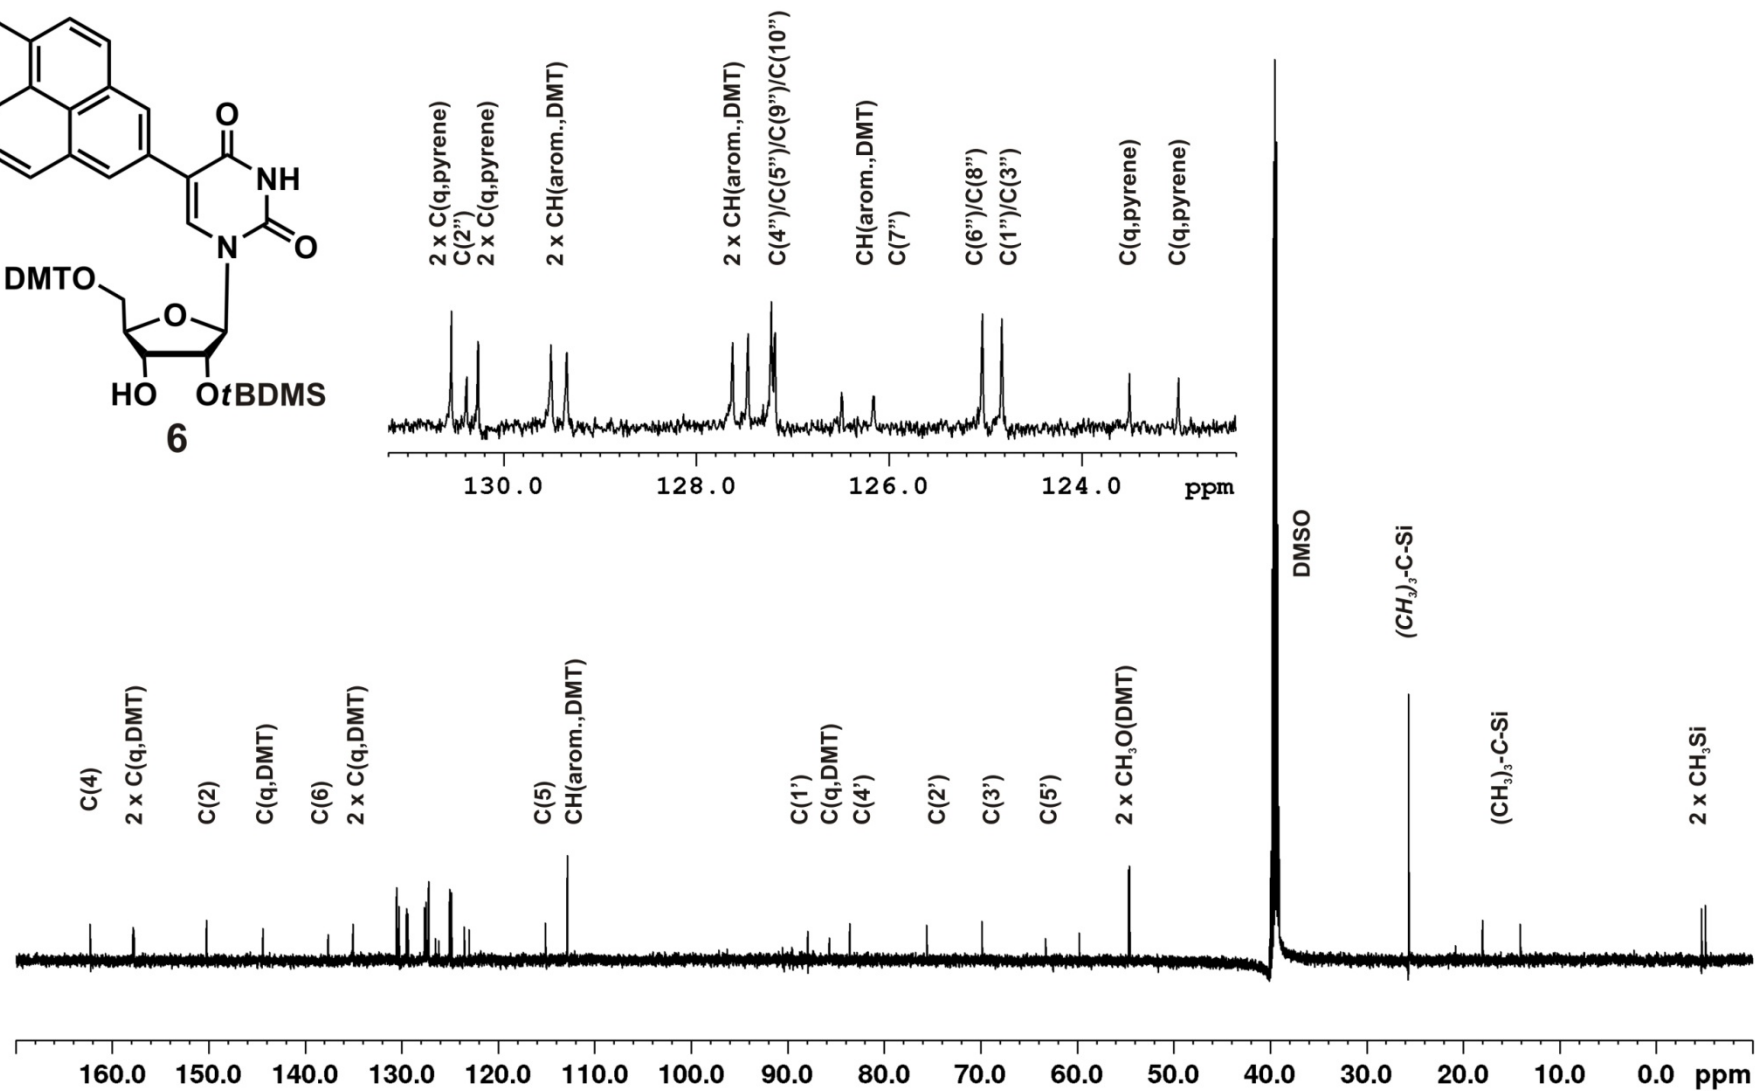

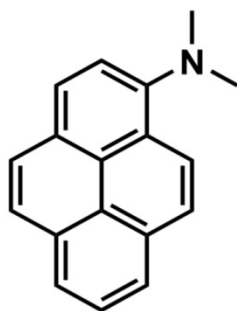

10

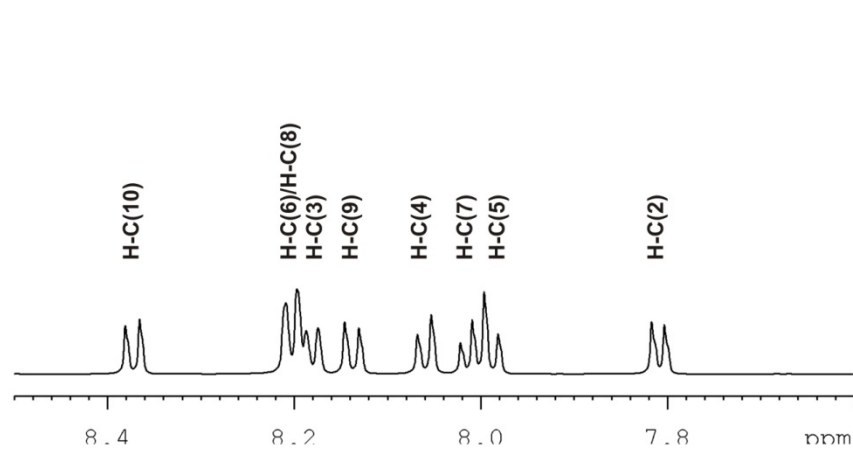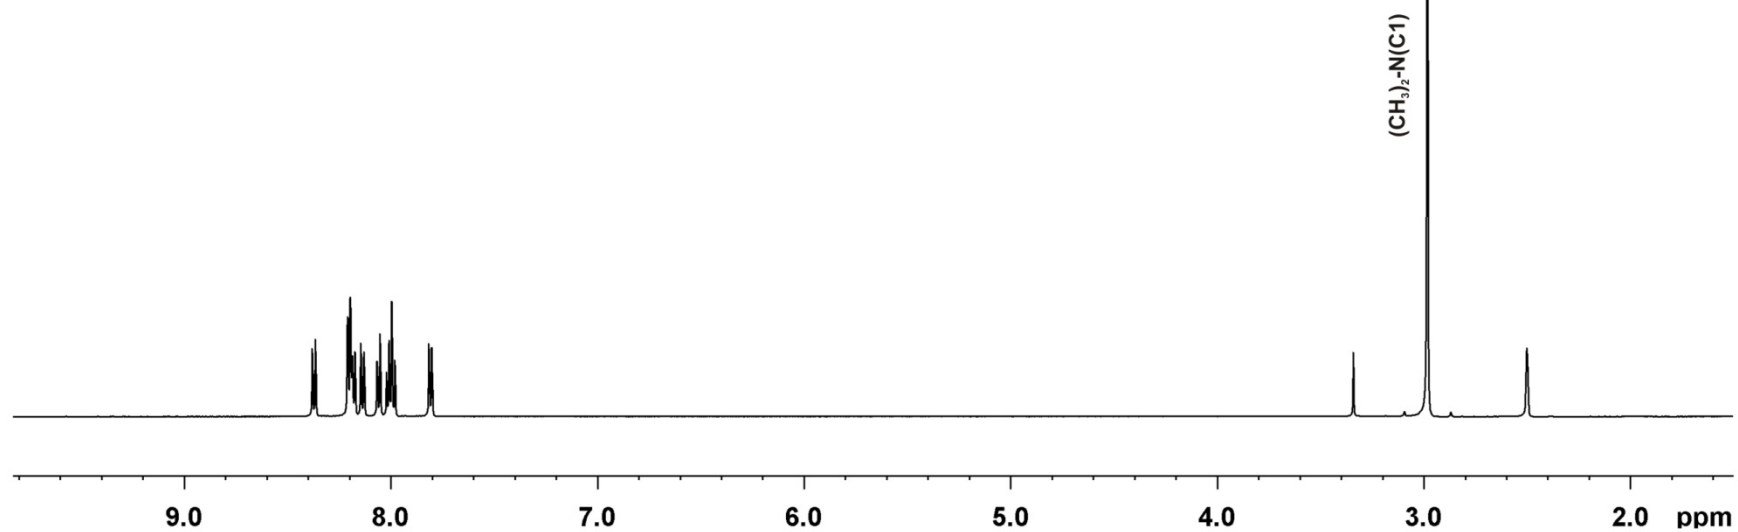

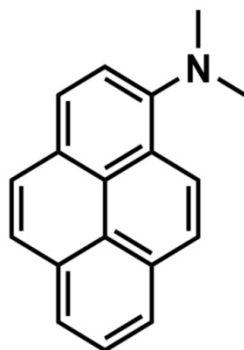

10

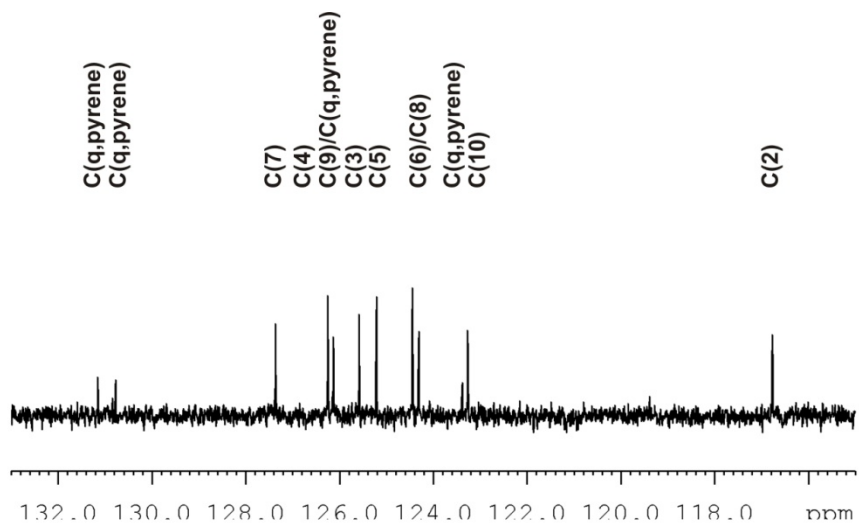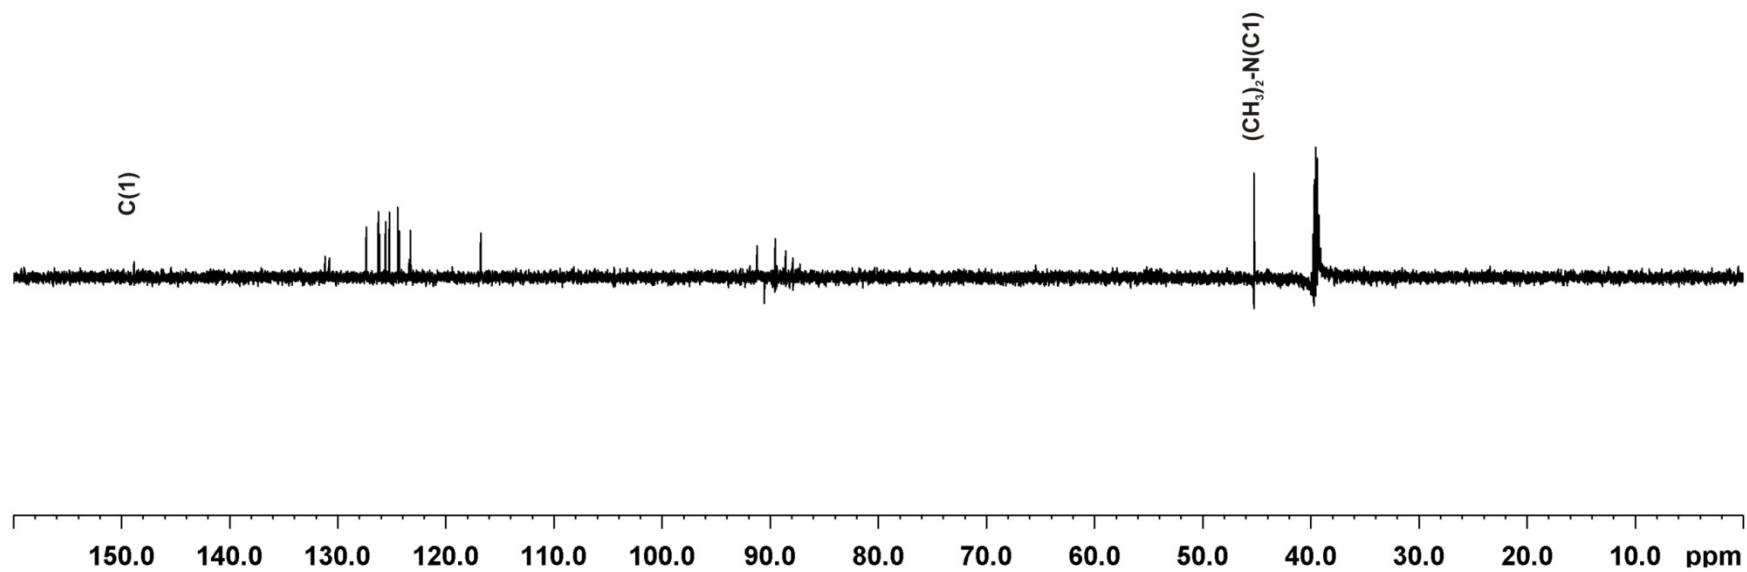

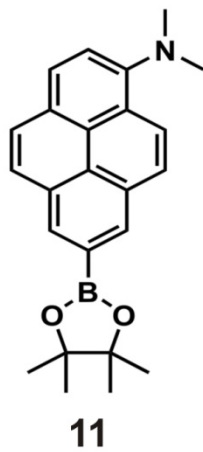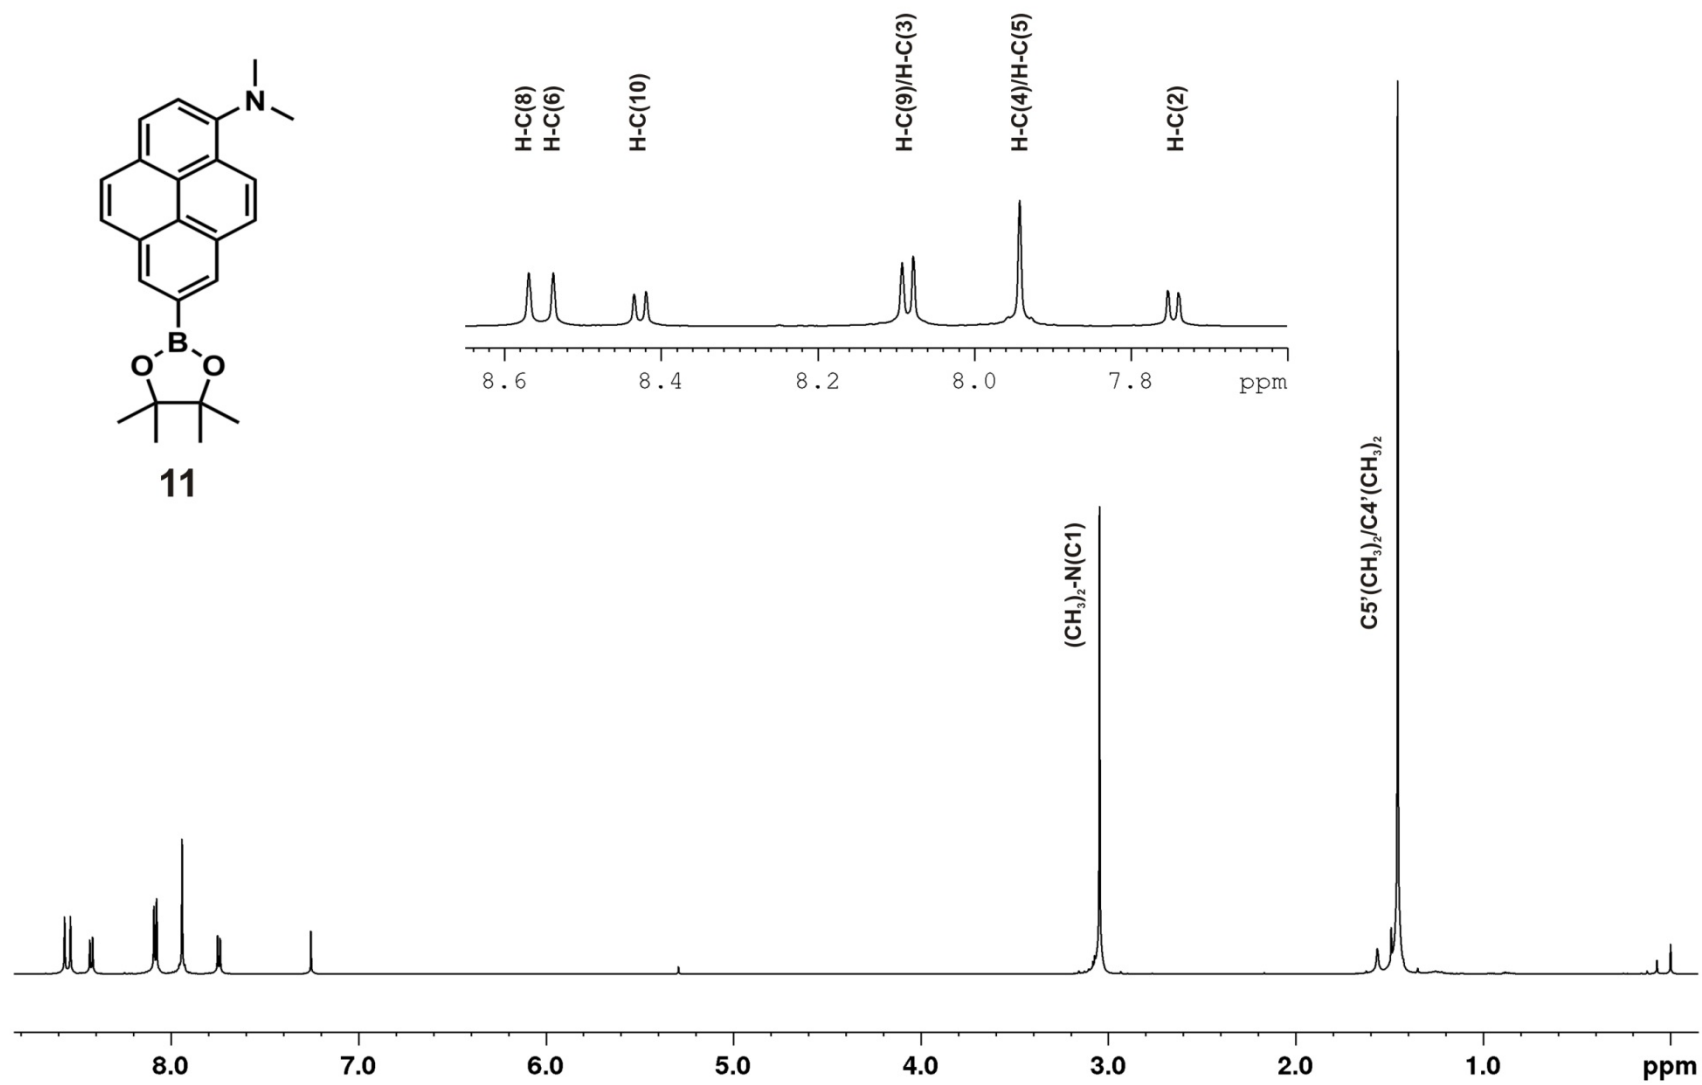



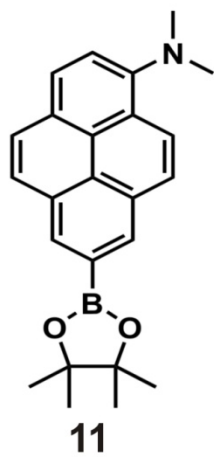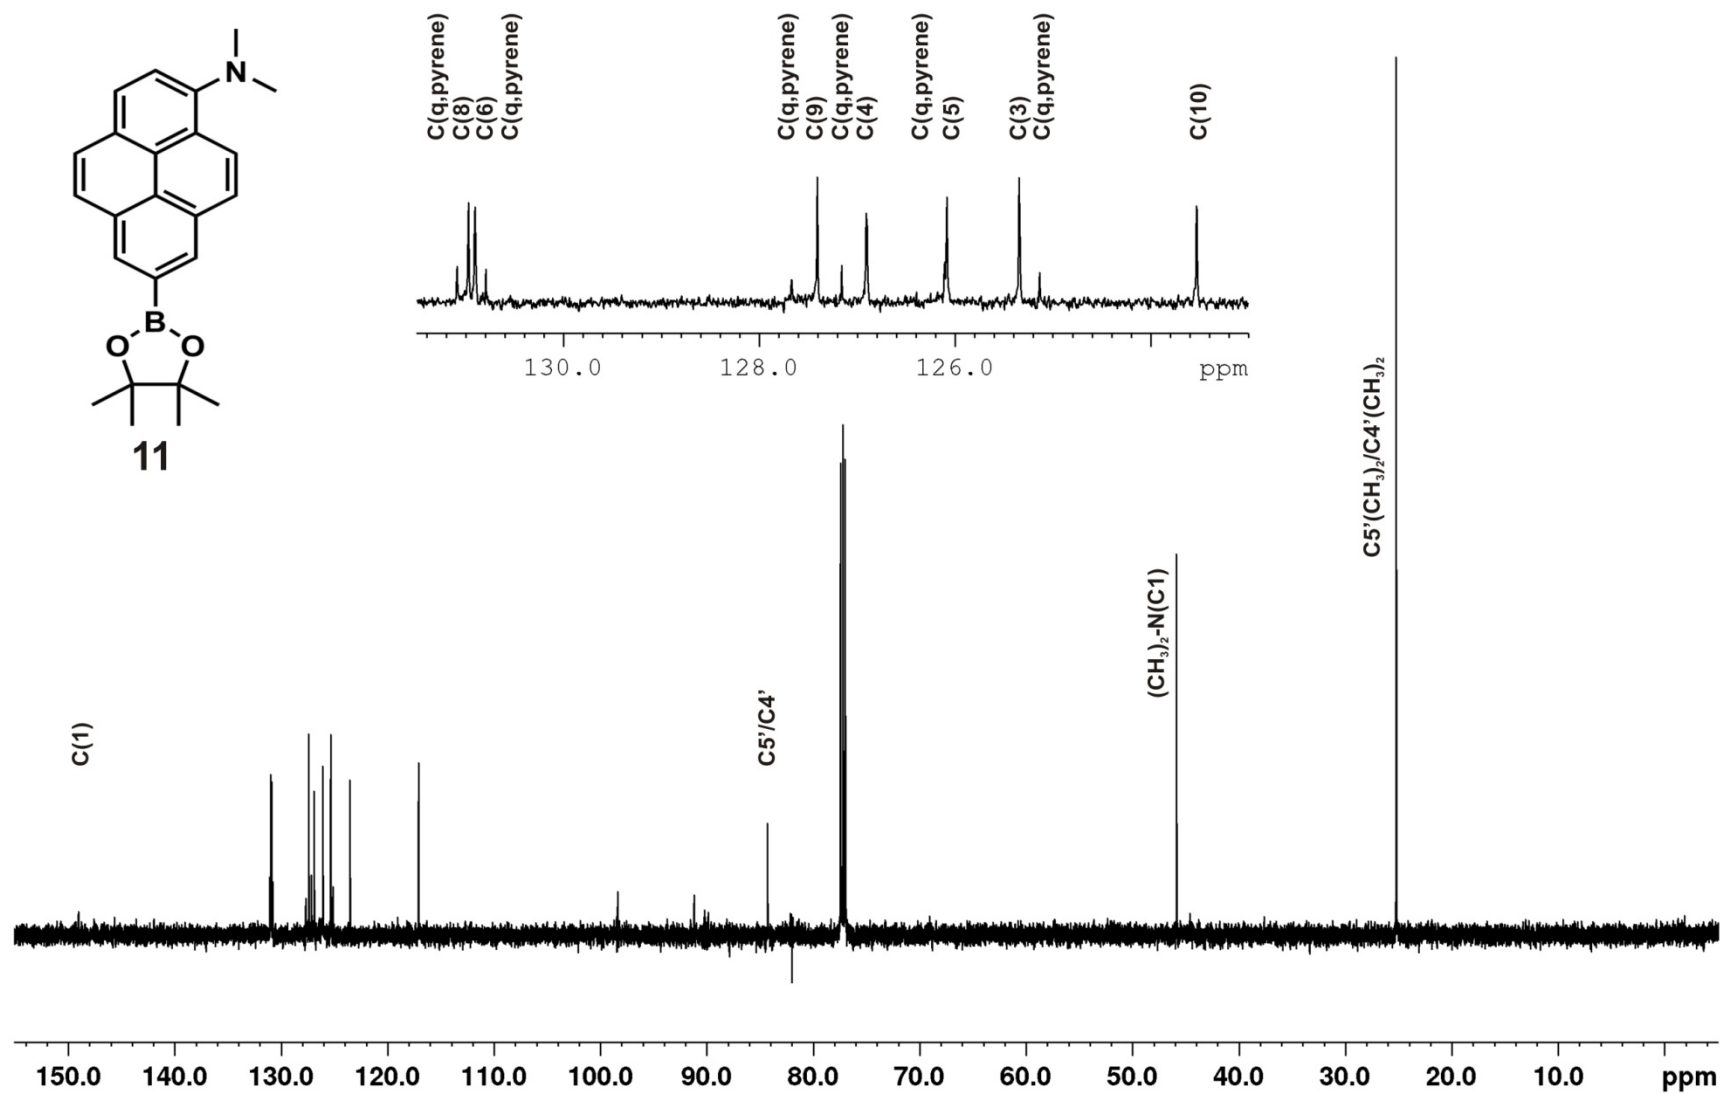

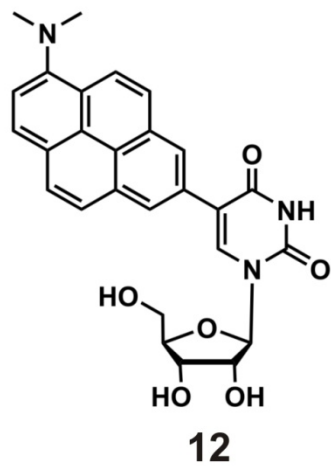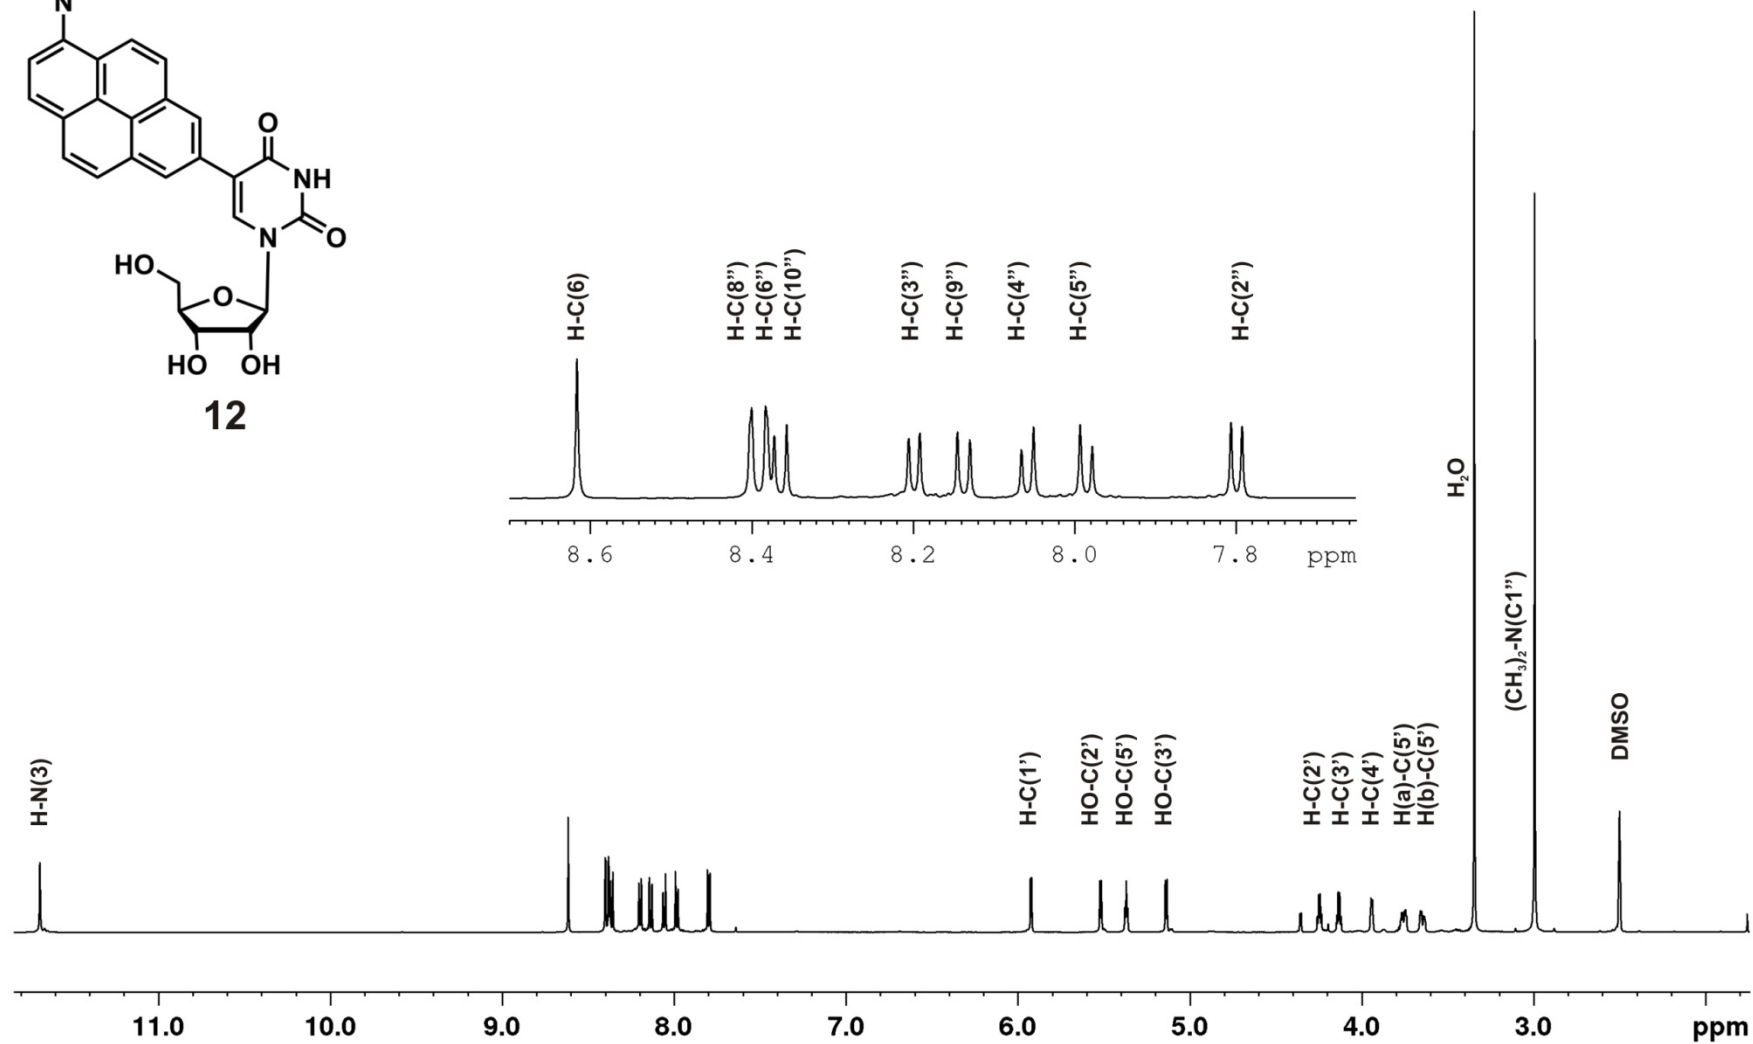

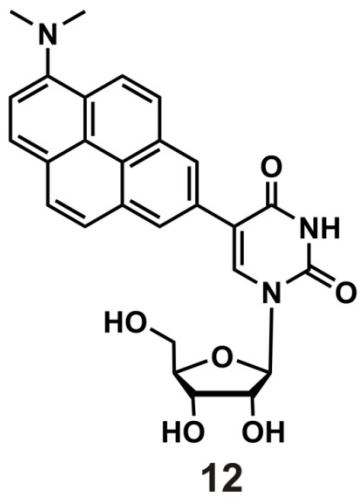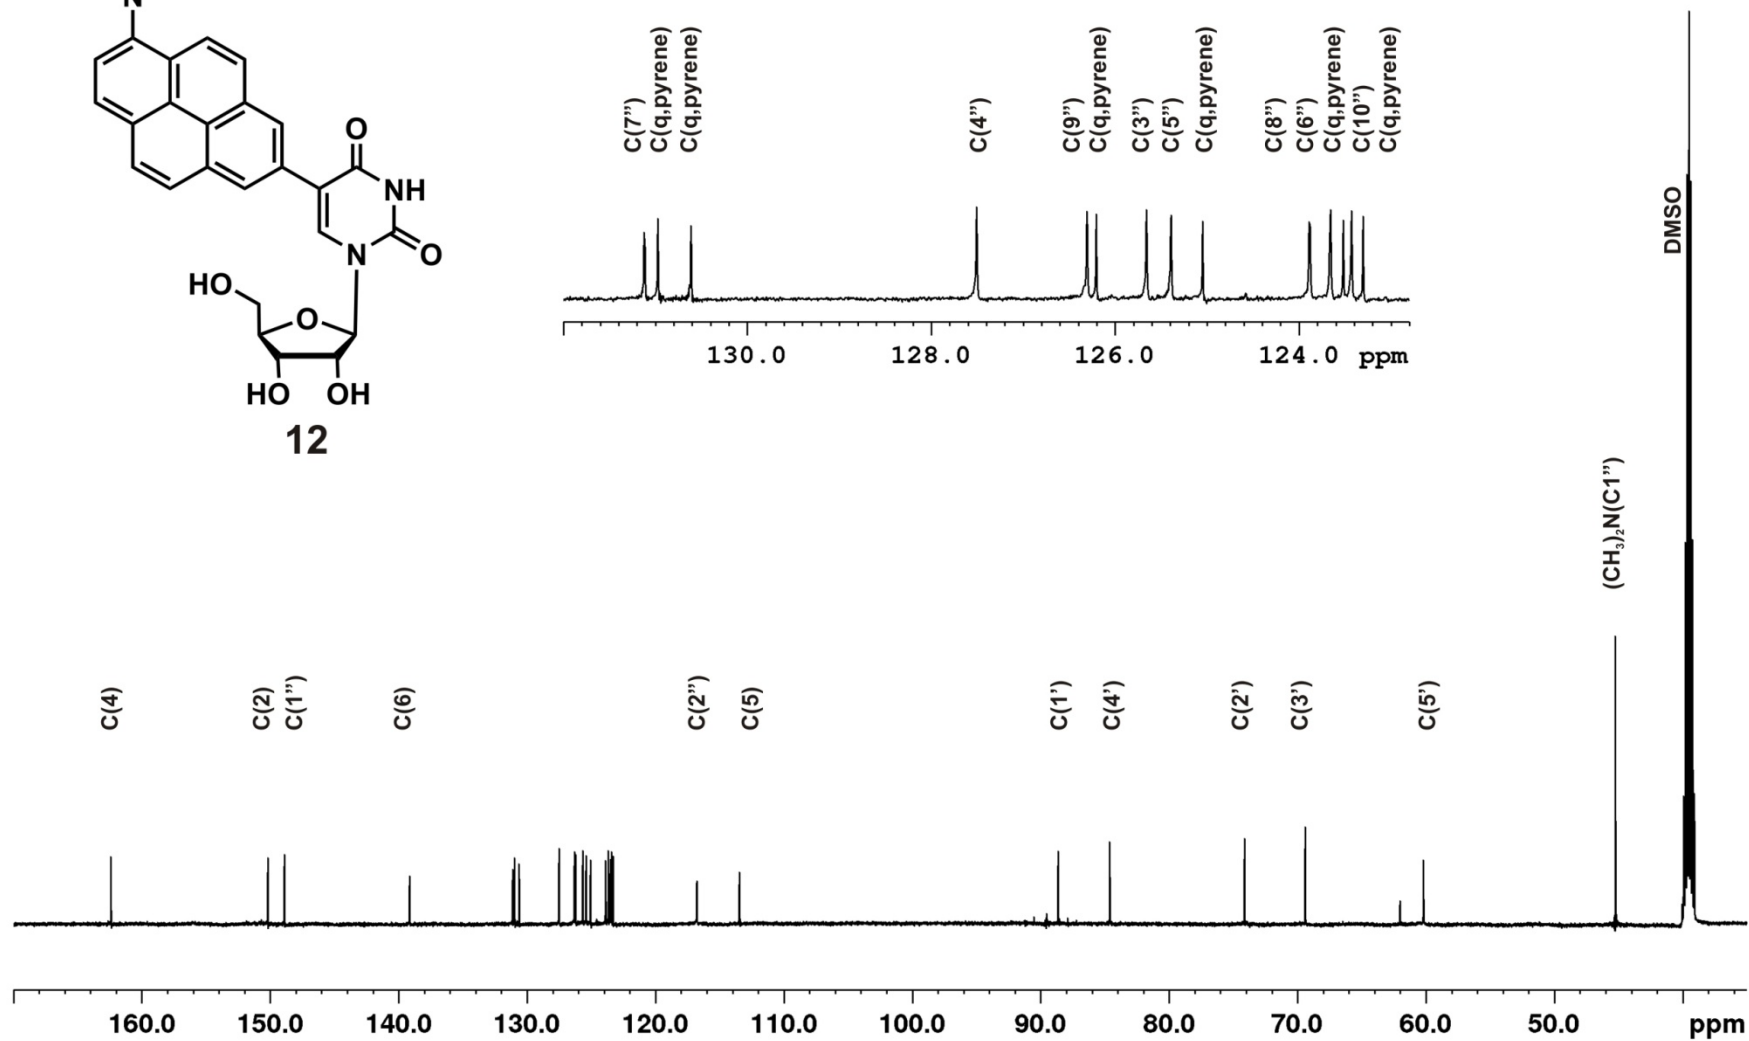

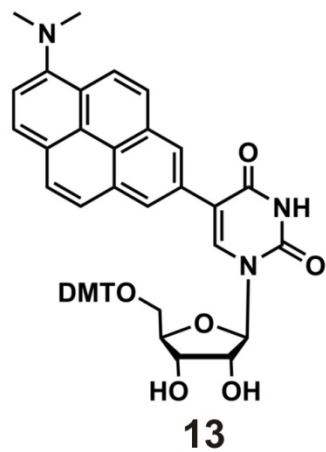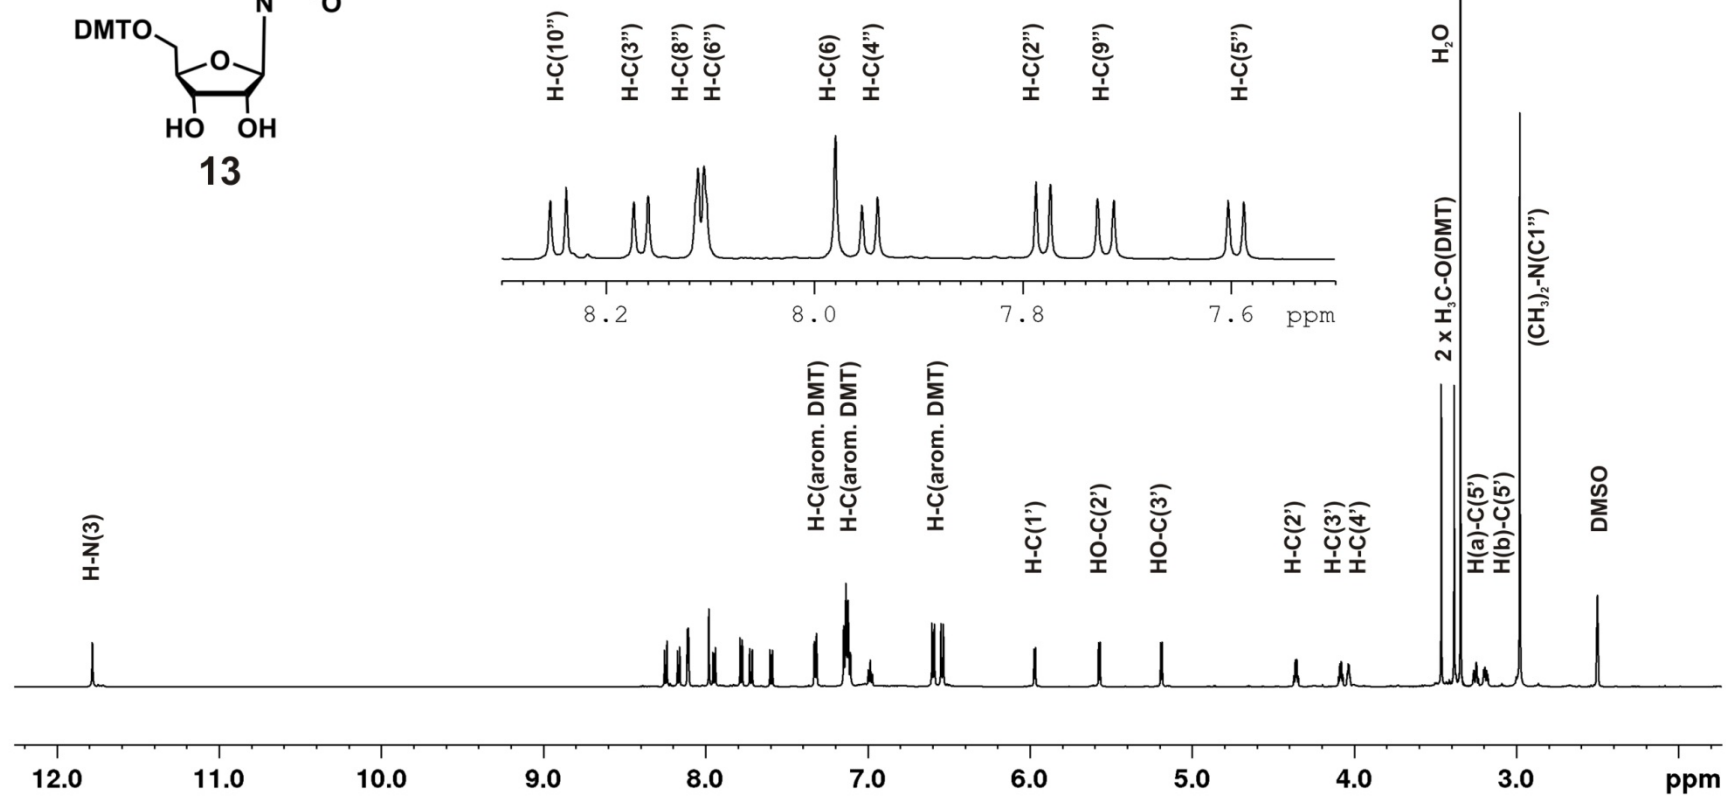

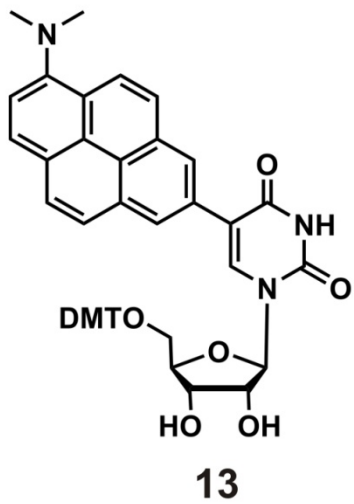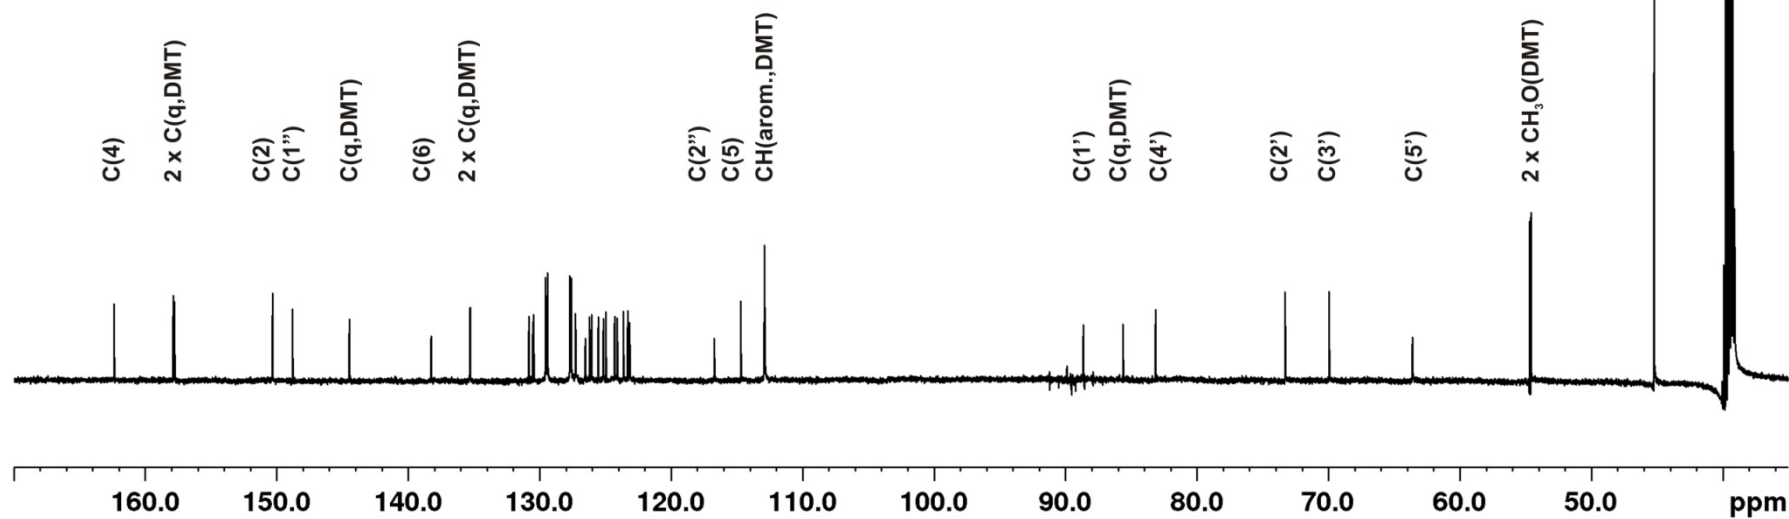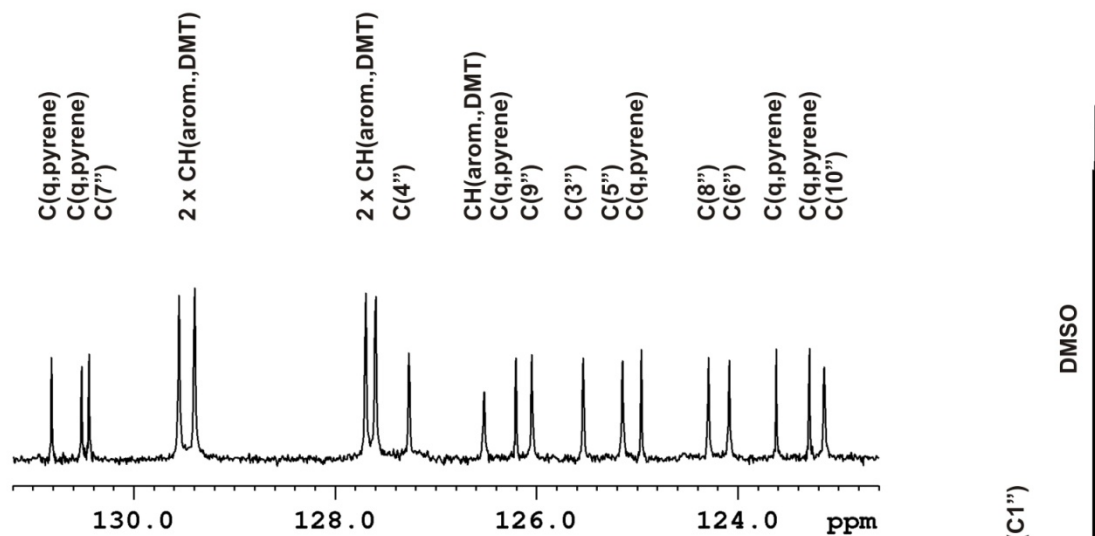

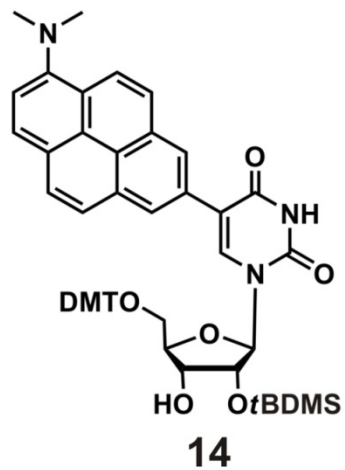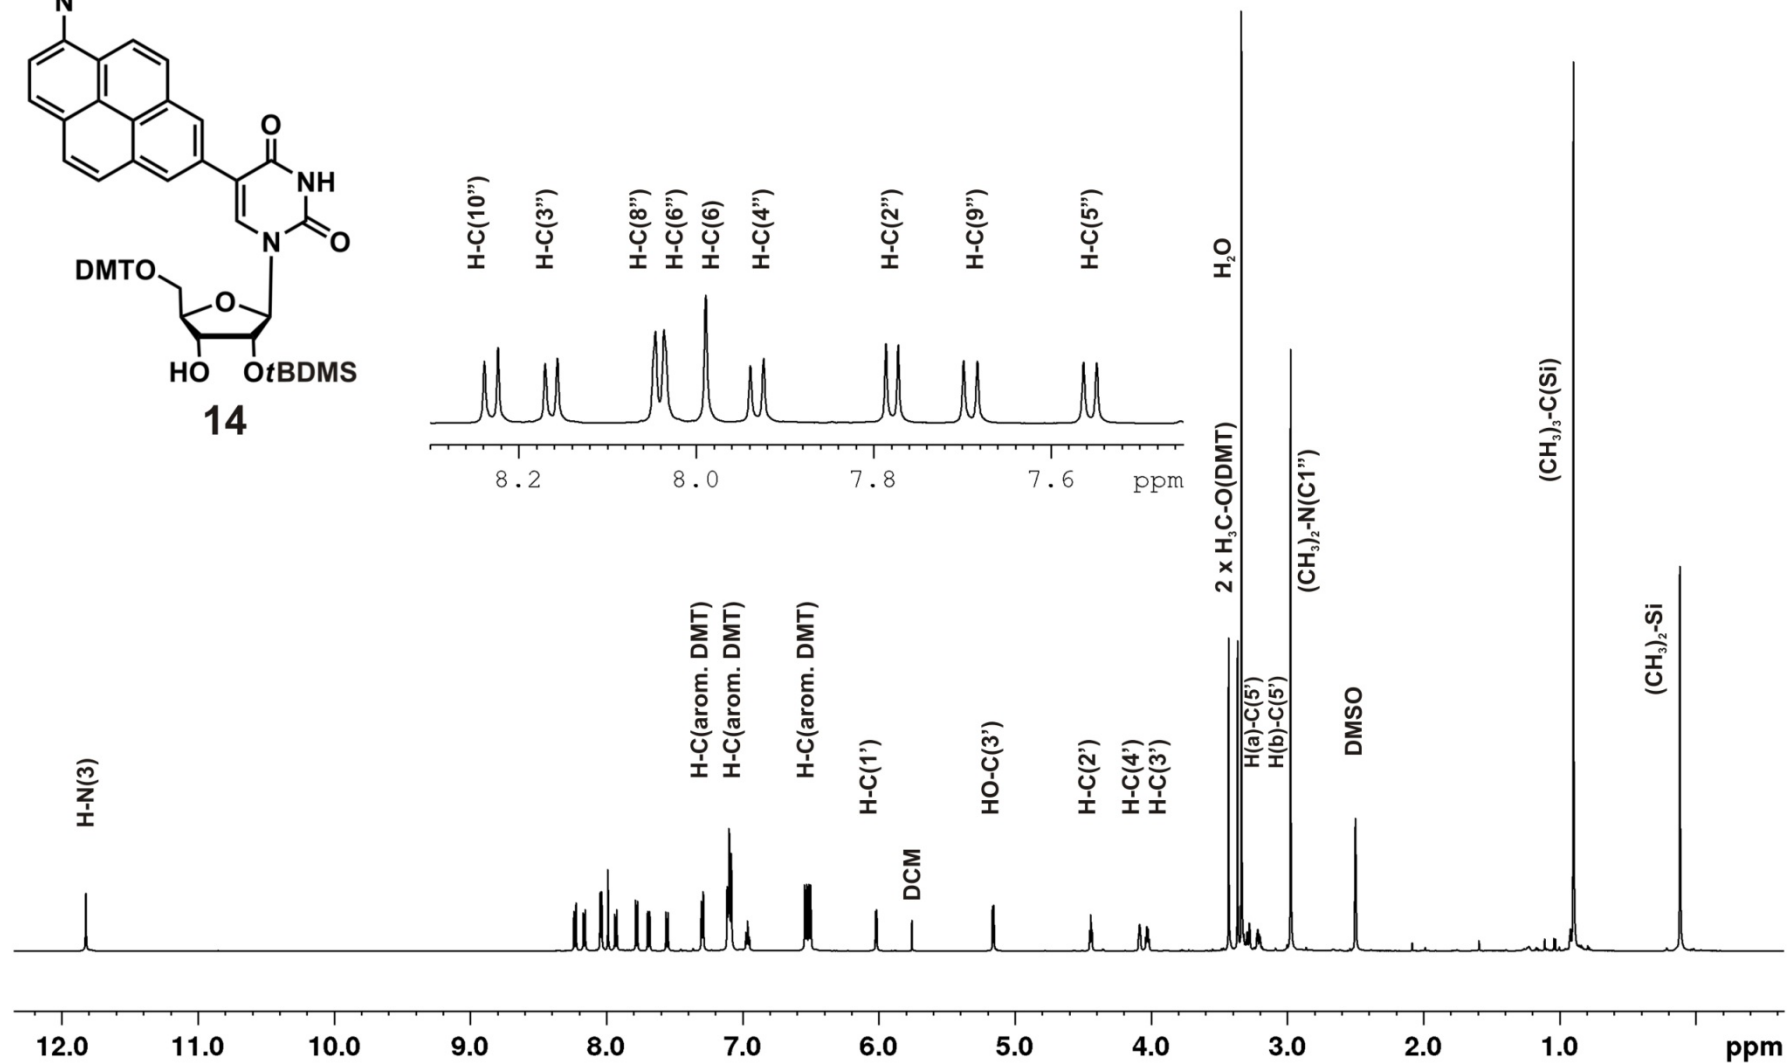

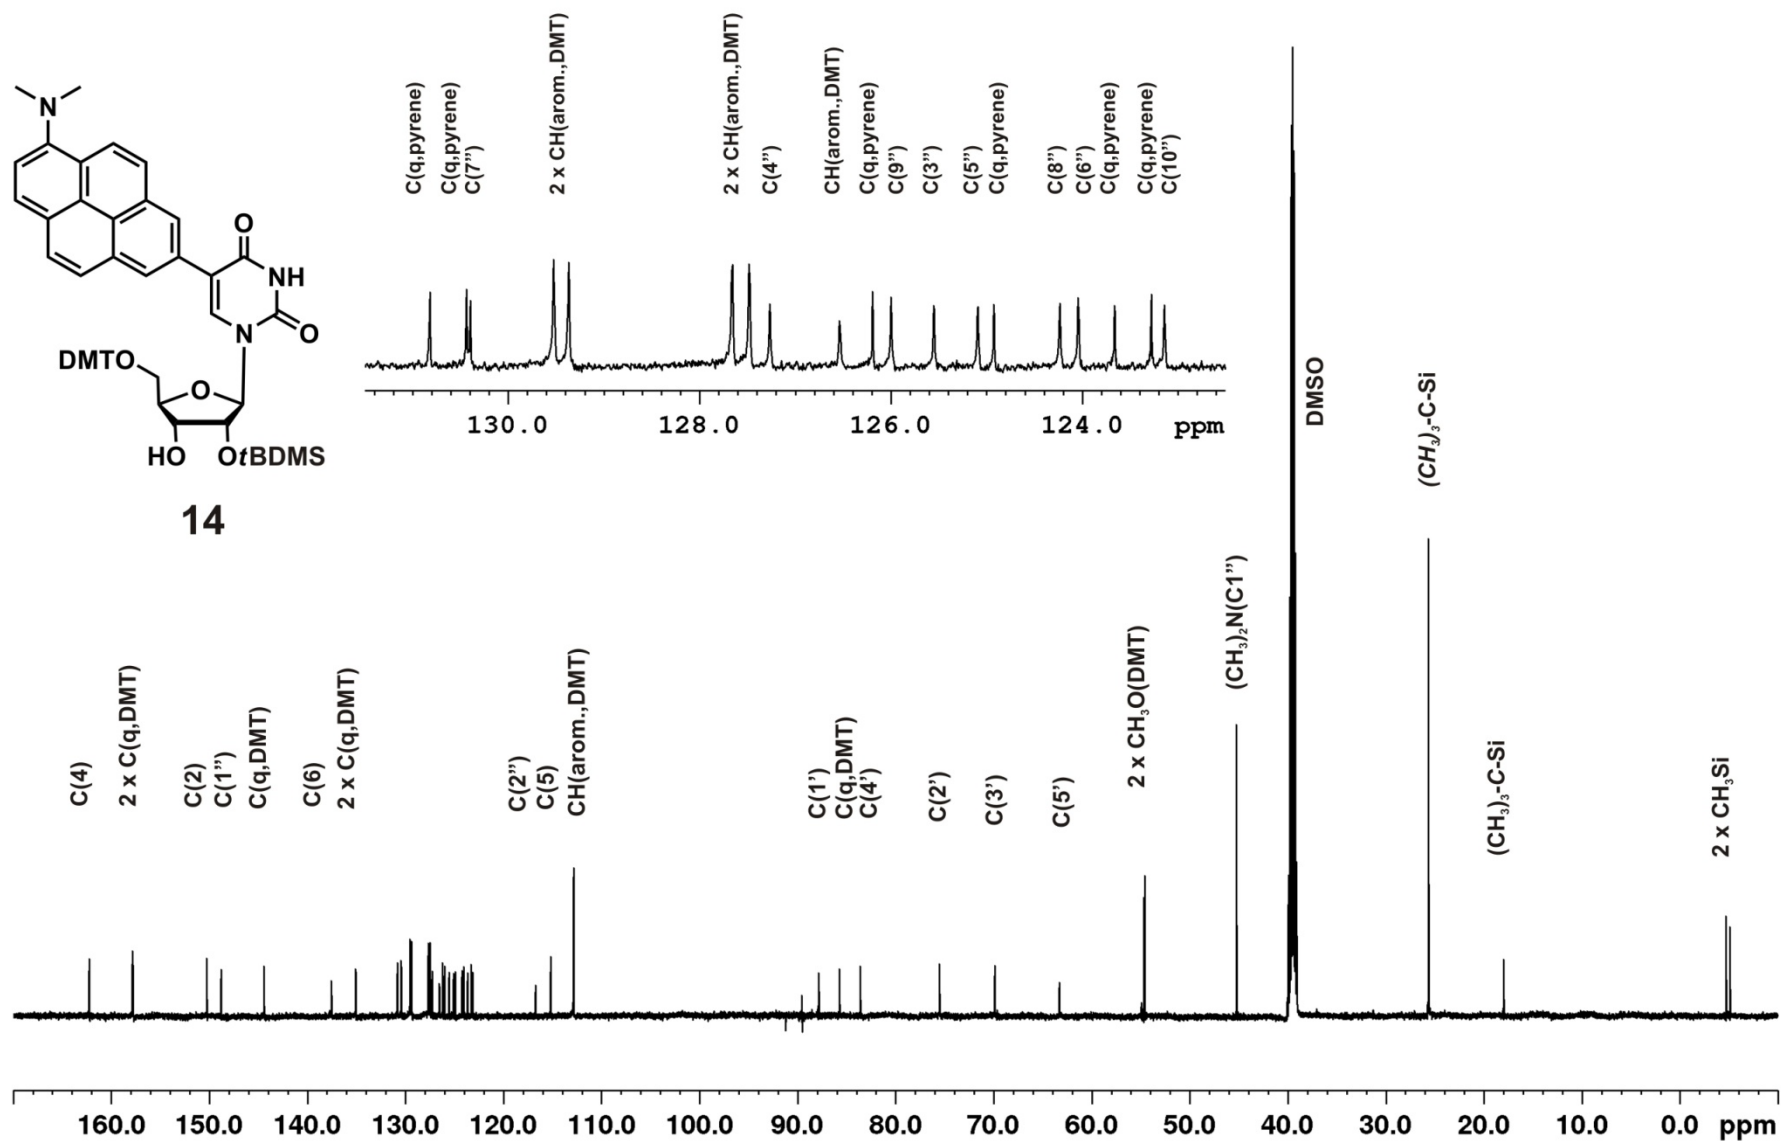

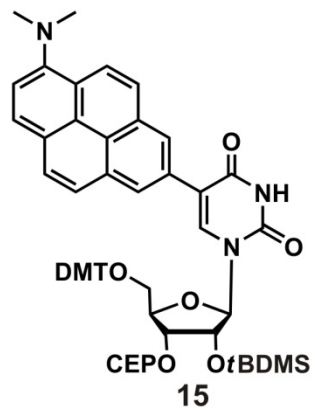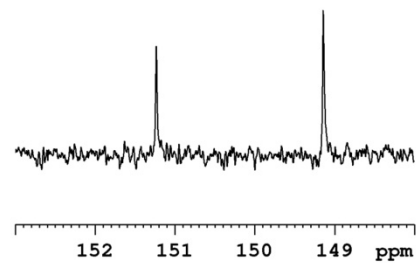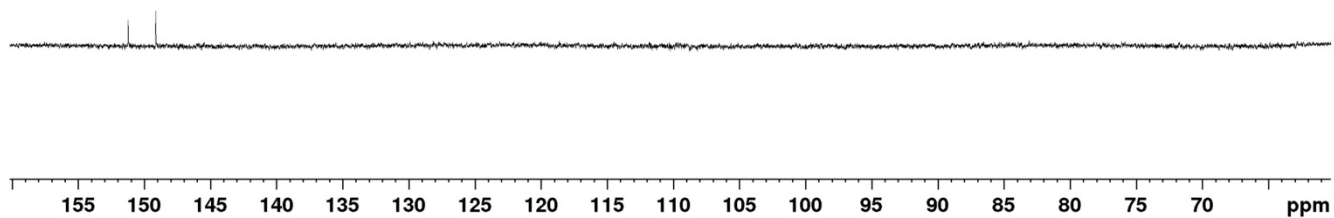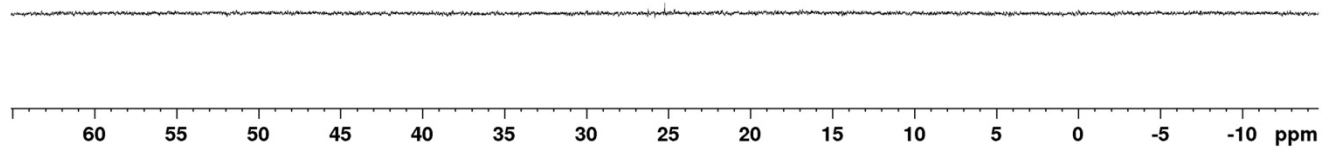

Supplement: c8ob02246a1.pdf [file c8ob02246a1.pdf]
